# Supplementary material for: A strategy to combine pathway-targeted low toxicity drugs in ovarian cancer
Source: PubMed Central journal article supplement (PMC4741591; doi:10.18632/oncotarget.5093), 2015-09-22
Supplement: oncotarget-06-31104-s001.pdf [file oncotarget-06-31104-s001.pdf]

## SUPPLEMENTARY FIGURES AND TABLE

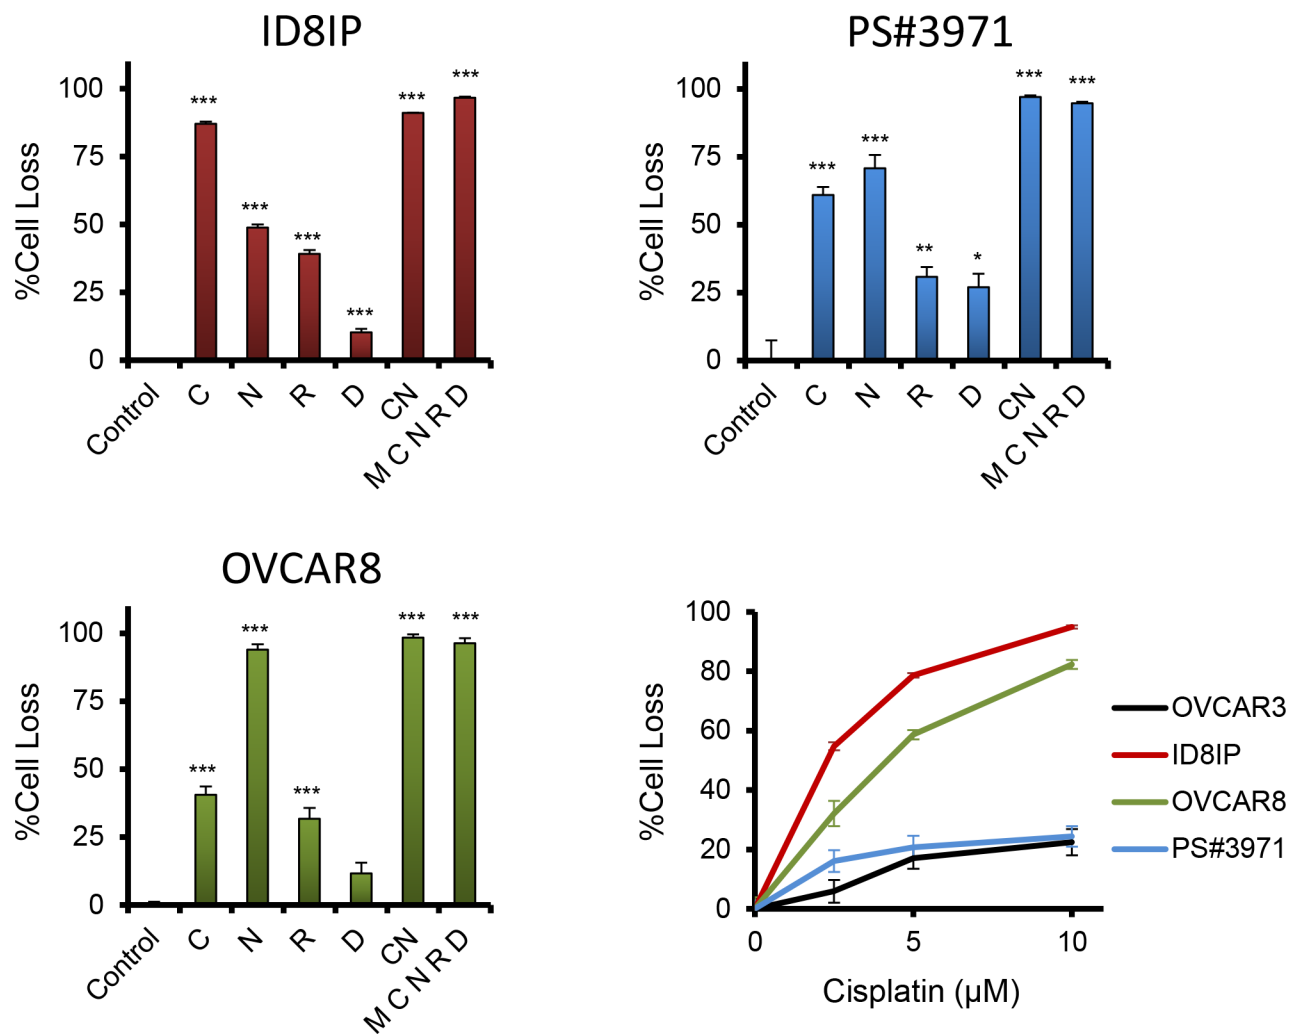

**Supplementary Figure S1: Multiple SOC are sensitive to autophagic drugs.** Crystal violet proliferation assay of indicated cell lines following 48 hours of treatment. Peak doses (Metformin, M 10 μM, Chloroquine, C 10 μM, Nelfinavir, N 10 μM, Rapamycin, R 10 nM, Dasatinib, D 50 nM) were used. \* $p < 0.05$ , \*\* $p < 0.01$ , \*\*\* $p < 0.001$  by *t*-test. Error bars are s.e.m.

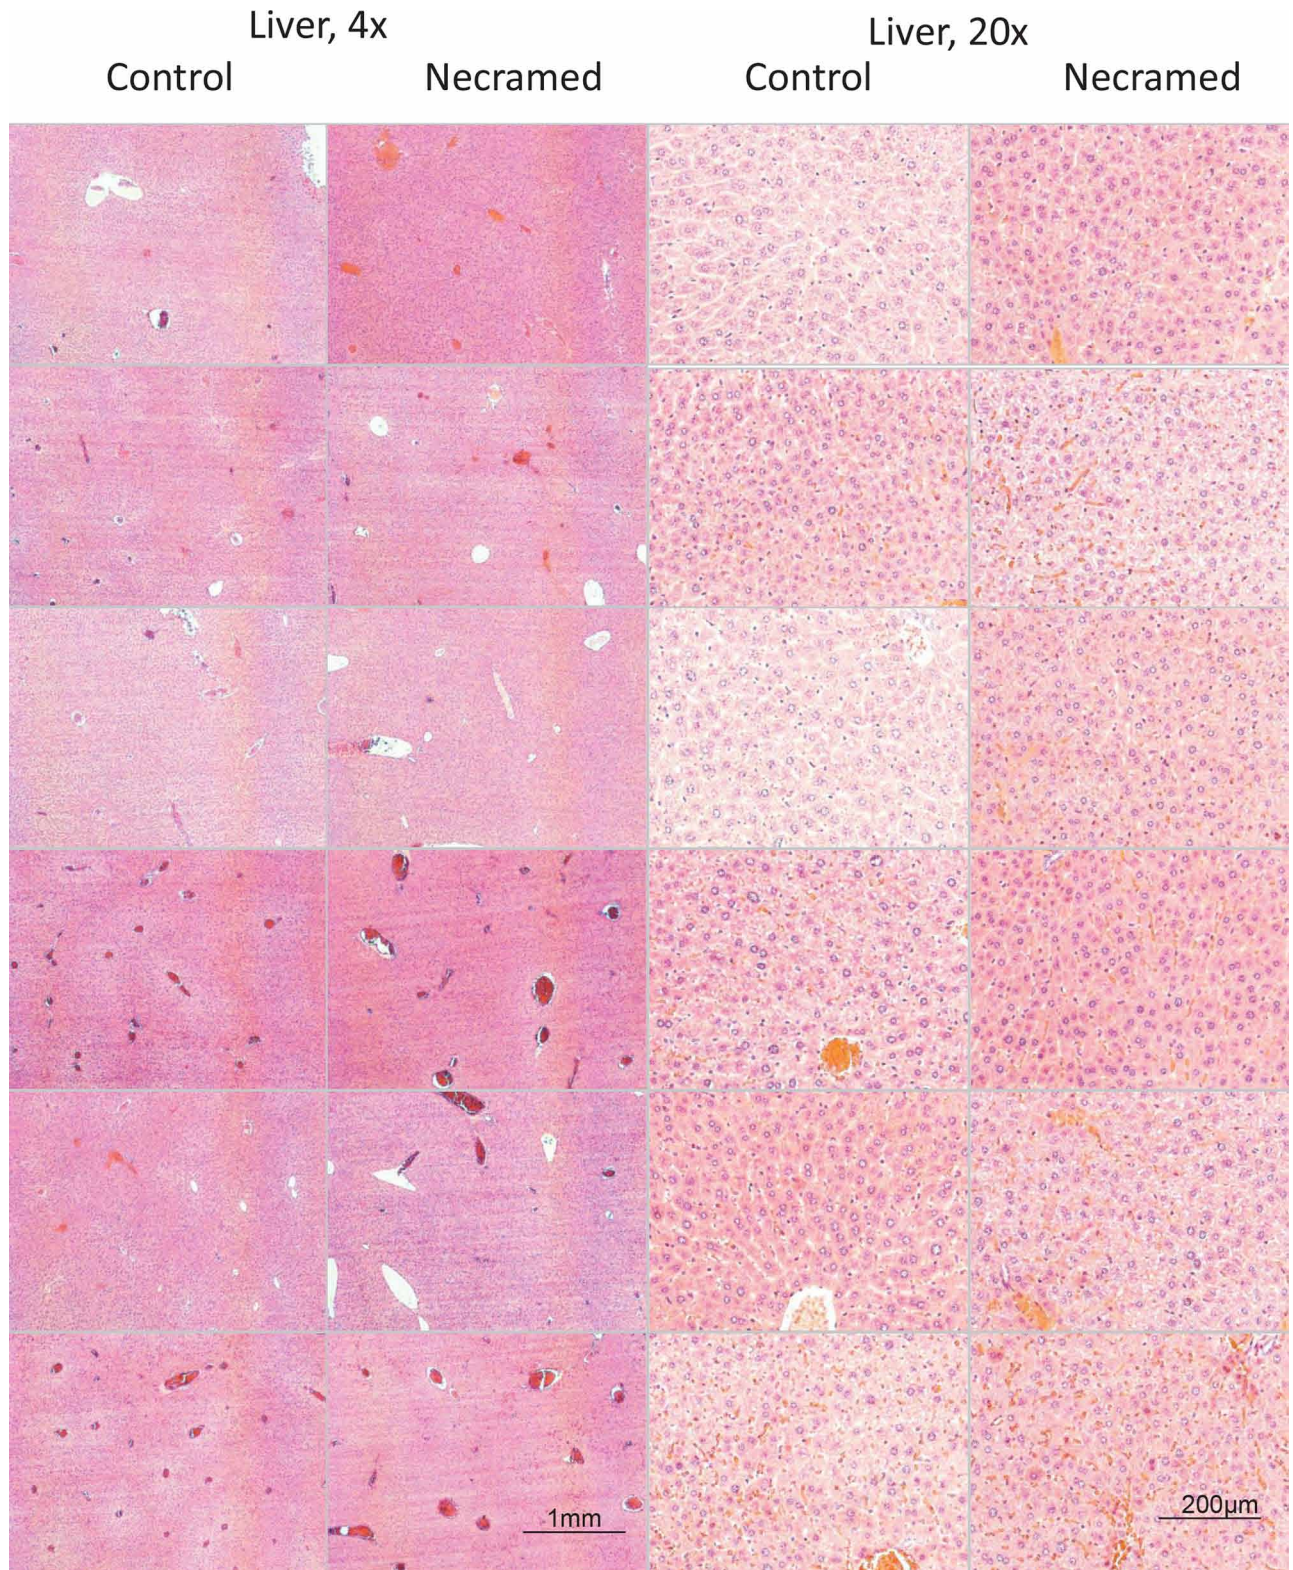



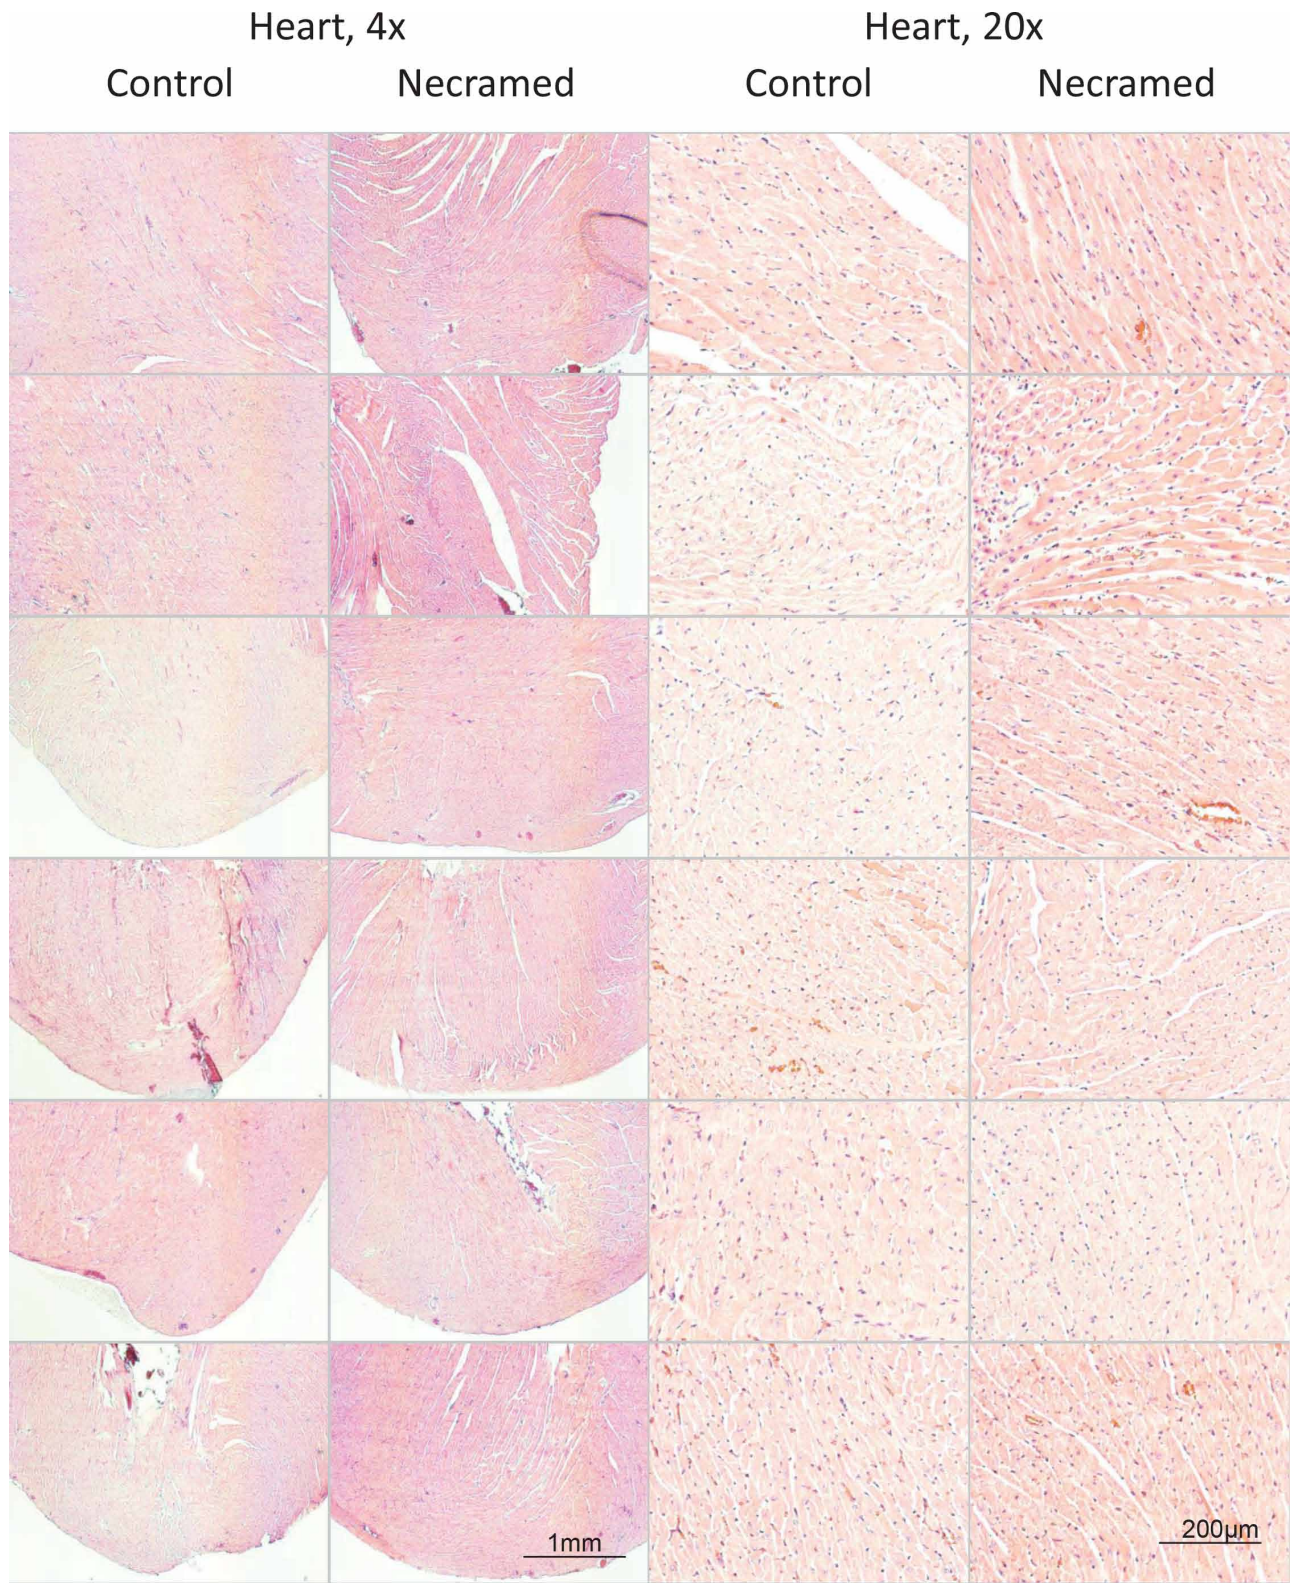



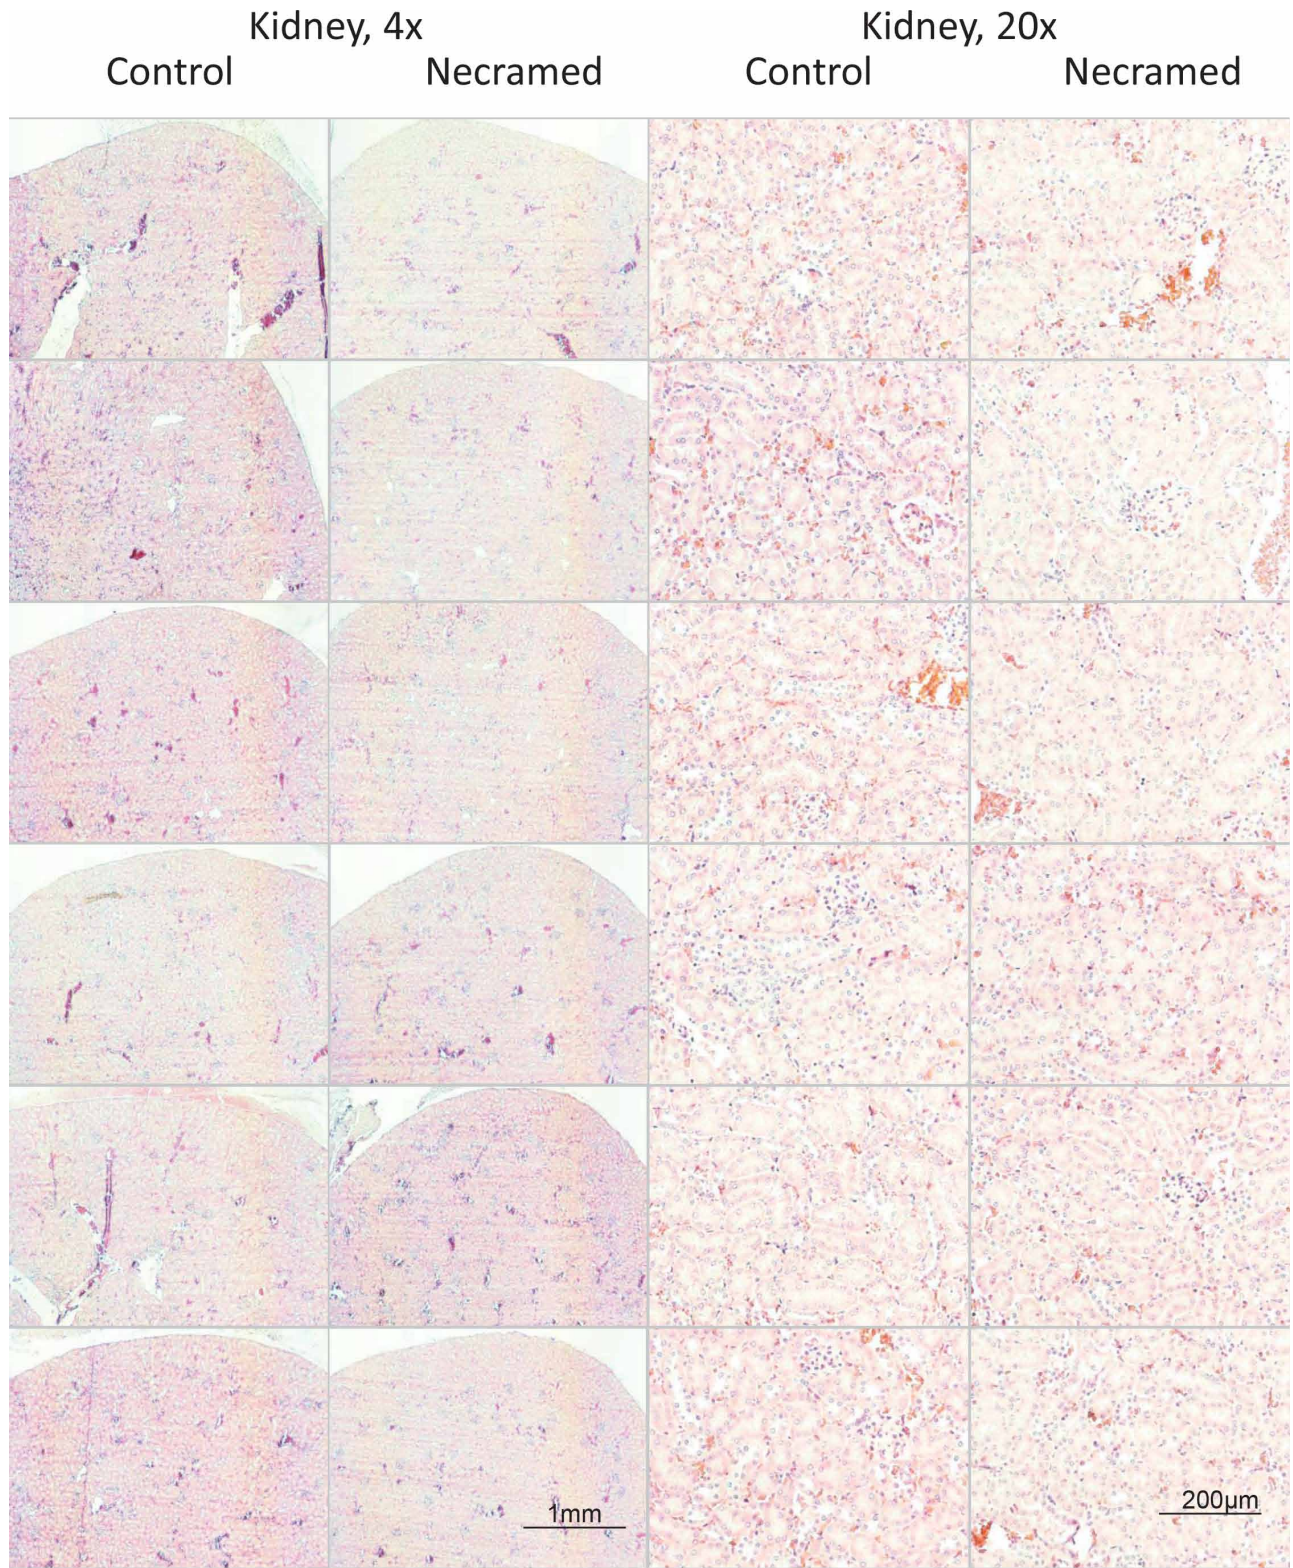

**Supplementary Figure S2: Histology of heart, liver, and kidney from Necramed treated mice.** Nude mice were treated for one week with Necramed, euthanized, and tissues harvested for H&E staining, as shown.

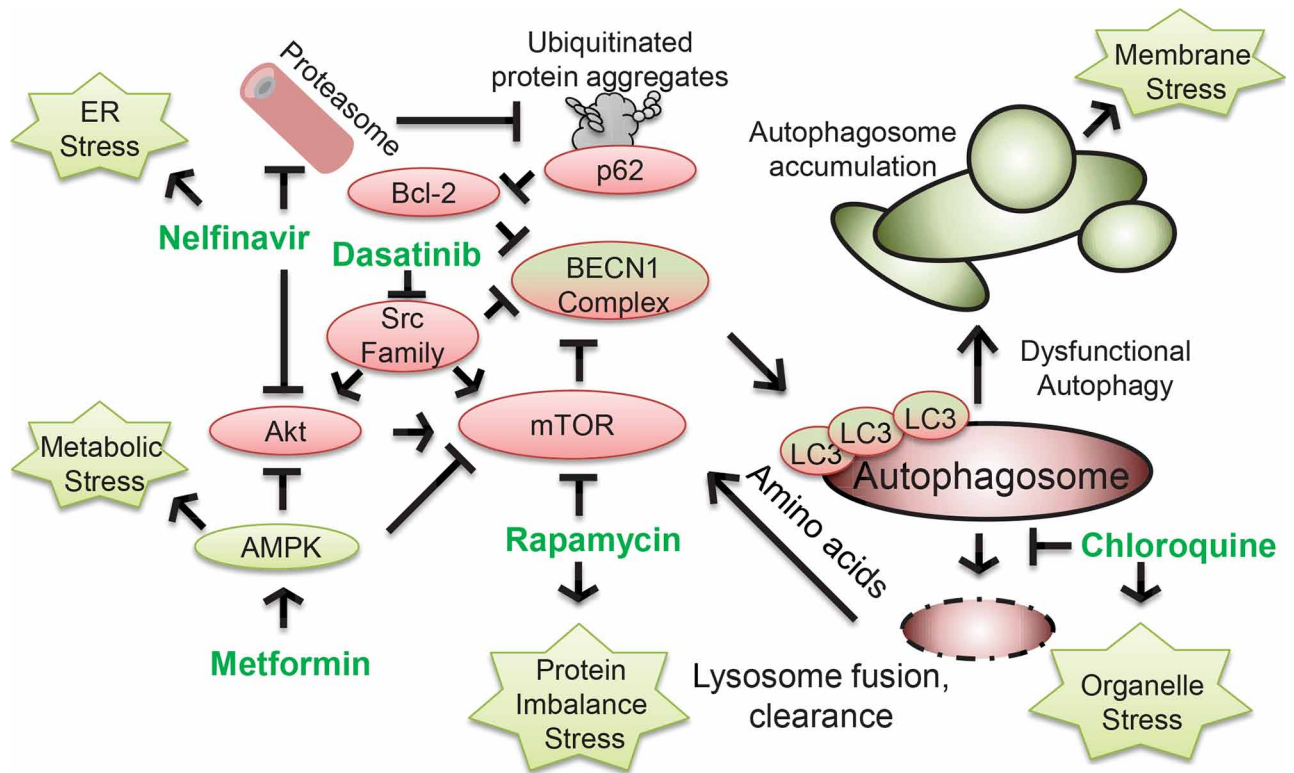

Supplementary Figure S3: Mechanisms of selected drugs in relation to autophagy.

**Supplementary Table S1: Blood Chemistry Panels for Control- or Necrased-Treated Mice**

| Test                 |      | Unit   | Range     | Control |      |      | Necrased |      |      | <i>p</i> value |
|----------------------|------|--------|-----------|---------|------|------|----------|------|------|----------------|
| Albumin              | ALB  | g/dL   | 2.5–4.8   | 4.2     | 4.1  | 3.6  | 3.6      | 3.6  | 4.4  | 0.775          |
| Alkaline Phosphatase | ALP  | U/L    | 62–209    | 89      | 84   | 65   | 78       | 74   | 105  | 0.632          |
| Alanine Transaminase | ALT  | U/L    | 28–132    | 41      | 40   | 53   | 55       | 115  | 143  | 0.145          |
| Amylase              | AMY  | U/L    | 1691–3615 | 1000    | 858  | 733  | 895      | 930  | 1051 | 0.364          |
| Bilirubin, total     | TBIL | mg/dL  | 0.1–0.9   | 0.4     | 0.4  | 0.3  | 0.3      | 0.5  | 0.4  | 0.649          |
| Blood Urea Nitrogen  | BUN  | mg/dL  | 18–29     | 21      | 22   | 19   | 15       | 14   | 18   | 0.032          |
| Calcium              | CA   | mg/dL  | 5.9–9.4   | 11.2    | 10.6 | 11.8 | 11.3     | 11.1 | 12.4 | 0.495          |
| Phosphorus           | PHOS | mg/dL  | 6.1–10.1  | 10.4    | 10.9 | 13.9 | 11.8     | 8.6  | 11   | 0.434          |
| Creatinine           | CRE  | mg/dL  | 0.2–0.8   | 0.4     | <0.2 | 0.3  | 0.4      | <0.2 | <0.2 | 0.608          |
| Glucose              | GLU  | mg/dL  | 90–192    | 262     | 181  | 141  | 186      | 234  | 197  | 0.796          |
| Sodium               | NA+  | mmol/L | 126–182   | 155     | 162  | 160  | 161      | 159  | 160  | 0.684          |
| Potassium            | K+   | mmol/L | 4.7–6.4   | >8.5    | >8.5 | >8.5 | >8.5     | 8.5  | >8.5 | 1.000          |
| Total Protein        | TP   | g/dL   | 3.6–6.6   | 5.7     | 5.2  | 5.7  | 5.2      | 5.9  | 6.2  | 0.540          |
| Globulin, calculated | GLOB | g/dL   | N/A       | 1.5     | 1.1  | 2.2  | 1.6      | 2.3  | 1.8  | 0.484          |

Mice were treated daily for 21 days with Necrased or PEG/diluent (as described in *Methods*). Blood was collected by cardiac puncture and sent for evaluation of analytes. Final concentrations were expressed as grams or milligrams per deciliter (g/dL or mg/dL), units per liter, (U/L) or millimoles per liter (mmol/L).
